# Supplementary material for: Health literacy and health promotion practices among clinical medicine students in Sichuan, China: a cross-sectional study
Source: Research Square preprint supplement (doi:10.21203/rs.3.rs-8556563/v1), 2026-01-22
Supplement: Supplementary file 1 [file 5ce7271bfd7e44de969a916c.pdf]

## Supplementary File 1

The challenges experienced by the respondents in relation to health literacy and health promotion practices.

Please use the following rating scale:

5 - Strongly Agree

4 - Agree

3 - Average

2 - Disagree

1 - Strongly Disagree

| Item/ Criteria                                                                                                                | 5 | 4 | 3 | 2 | 1 |
|-------------------------------------------------------------------------------------------------------------------------------|---|---|---|---|---|
| <b>Health Literacy</b>                                                                                                        |   |   |   |   |   |
| 1. Insufficient knowledge on health                                                                                           |   |   |   |   |   |
| 2. Difficulty in verifying and filtering accurate health information.                                                         |   |   |   |   |   |
| 3. Lack of health awareness and positive beliefs.                                                                             |   |   |   |   |   |
| 4. Instability of health beliefs due to external influences, making it difficult to maintain a healthy lifestyle.             |   |   |   |   |   |
| 5. Unhealthy lifestyle habits, including poor sleep, irregular diet, and lack of exercise.                                    |   |   |   |   |   |
| 6. Lack of self-discipline to adhere to healthy eating, exercise and other behaviors.                                         |   |   |   |   |   |
| <b>Health Promotion Practices</b>                                                                                             |   |   |   |   |   |
| 7. Communication barriers with professionals, leading to inaccurate health information.                                       |   |   |   |   |   |
| 8. Inadequate expression of their health needs and problems.                                                                  |   |   |   |   |   |
| 9. Insufficient investment in and support for health promotion by schools and society.                                        |   |   |   |   |   |
| 10. Lack of adequate nutritional knowledge.                                                                                   |   |   |   |   |   |
| 11. Inadequacy of existing health literacy measurement tools for college students.                                            |   |   |   |   |   |
| 12. Insufficiently systematic and comprehensive health support from family, school and society.                               |   |   |   |   |   |
| 13. lack of awareness and ability to take responsibility for health.                                                          |   |   |   |   |   |
| 14. Inability to cope with setbacks and difficulties, leading to negative emotions and behaviors that may endanger lives.     |   |   |   |   |   |
| 15. Lack of sufficient time and motivation to exercise due to academic pressure, time constraints, poor self-management, etc. |   |   |   |   |   |
| 16. High levels of stress from studies, employment, and relationships.                                                        |   |   |   |   |   |
| 17. Underdeveloped school health management systems.                                                                          |   |   |   |   |   |

|                                                                                                 |  |  |  |  |  |
|-------------------------------------------------------------------------------------------------|--|--|--|--|--|
| 18.Campus infrastructure and policies may not adequately adapt to evolving health needs.        |  |  |  |  |  |
| 19.Environmental changes, including climate change and pollution, create new health challenges. |  |  |  |  |  |
